# Supplementary material for: Review of Oral Rabies Vaccination of Dogs and Its Application in India
Source: MDPI journal article supplement (doi:10.3390/v14010155), 2022-01-14
Supplement: s1 [file s1]

**Table S1.** Parameter values used to evaluate the human safety of a 40,000 bait ORV campaign for dogs in Goa, India.

|                                                                                                                                                     | Value    | Lower bound | Upper bound |
|-----------------------------------------------------------------------------------------------------------------------------------------------------|----------|-------------|-------------|
| <b>Vaccine Specific parameters for SPBN GASGAS</b>                                                                                                  |          |             |             |
| Probability a SAE will occur in an immune competent person who has made contact with the bait on a mucosal membrane (direct or via lick)            | 0.00009  | 0.0000009   | 0.009       |
| Probability a SAE will occur in an immune competent person who has made contact with the bait transdermally (direct or via bite)                    | 0.00009  | 0.0000009   | 0.009       |
| Probability a SAE will occur in an immune competent person who has received a severe bite from an animal who has recently consumed the bait         | 0.00009  | 0.0000009   | 0.009       |
| Probability a SAE will occur in an immune compromised person who has made contact with the bait on a mucosal membrane (direct or via lick)          | 0.0378   | 0.011       | 0.378       |
| Probability a SAE will occur in an immune compromised person who has made contact with the bait transdermally (direct or via bite)                  | 0.0142   | 0.00142     | 0.142       |
| Probability a SAE will occur in an immune compromised person who has received a severe bite from an animal who has recently consumed the bait       | 0.0779   | 0.0366      | 0.779       |
| Percent of animals who shed the vaccine in their saliva                                                                                             | 0.2      | 0.1         | 0.3         |
| Length of time virus can be shed in the saliva of an animal that has recently consumed the bait (days)                                              | 0.5      | 0.16667     | 1           |
| Length of time the virus stays viable when left in the environment (days)                                                                           | 4        | 1.5         | 15          |
| Probability an animal will experience a vaccine induced rabies case                                                                                 | 0        | 0           | 0           |
| Death rate of a rabid animal                                                                                                                        | 0.071429 | 0.05        | 0.1         |
| Probability someone with a severe bite that penetrates the cranial cavity or abdomen will not benefit from PEP                                      | 0.7      | 0.6         | 0.8         |
| Probability that someone who receives PEP for any exposure other than a severe bite will not benefit from PEP                                       | 0        | 0           | 0           |
| <b>Region-specific parameters</b>                                                                                                                   |          |             |             |
| What proportion (0 to 1) of the population is severely immunocompromised?                                                                           | 0.001    | 0.0001      | 0.01        |
| What proportion of the baits are expected to be ingested by the target animal?                                                                      | 0.8      | 0.4         | 1           |
| What proportion of the baits are expected to be ingested by the non-target animal?                                                                  | 0.005    | 0.0025      | 0.0075      |
| What proportion of the <i>unconsumed baits</i> are expected to be left in the environment?                                                          | 0.1      | 0.05        | 0.15        |
| How often will humans come into contact with a bait that is left in the environment? (Contacts/bait in environment/day)                             | 0.00002  | 0.000002    | 0.002       |
| What is the probability that a human who makes direct contact with a found bait will contaminate a mucosal membrane? (e.g. an open wound)           | 0.002    | 0.001       | 0.003       |
| What is the probability that a human who makes direct contact with a found bait will get the vaccine inside their body (through nose, mouth, etc.)? | 0.00002  | 0.000002    | 0.002       |

|                                                                                                                                                                 |          |          |        |
|-----------------------------------------------------------------------------------------------------------------------------------------------------------------|----------|----------|--------|
| What percent of the human population will be licked each day by the target animal (Percent licked per year/365)?                                                | 0.002778 | 0.0003   | 0.03   |
| What percent of the human population will be licked each day by the non-target animal (Percent licked per year/365)?                                            | 0.00002  | 0.000002 | 0.002  |
| What is the probability that a human who is licked by an animal will receive the lick on a mucosal membrane (e.g. open wound, mouth)?                           | 0.002    | 0.0002   | 0.02   |
| What percent of the human population will be bitten each day by the target animal (Percent bitten per year/365)?                                                | 0.003044 | 0.0015   | 0.0045 |
| What percent of the human population will be bitten each day by the non-target animal (Percent bitten per year/365)?                                            | 0.00002  | 0.000002 | 0.002  |
| What proportion of rabid target animals will bite a human before it dies?                                                                                       | 0.4      | 0.2      | 0.6    |
| What proportion of rabid non-target animals will bite a human before it dies?                                                                                   | 0.002    | 0.0002   | 0.02   |
| Among rabid target animals that bite, how many humans, on average, will the rabid target animal bite per day?                                                   | 0.266667 | 0.027    | 2.7    |
| Among rabid non-target animals that bite, how many humans, on average, will the rabid non-target animal bite per day?                                           | 0.002    | 0.0002   | 0.02   |
| What is the probability a bite from an animal will penetrate the cranial or peritoneal cavity?                                                                  | 0.00002  | 0.000002 | 0.002  |
| What proportion of humans who have physically handled the bait in such a manner that the vaccine touched a mucosal membrane or entered the body will seek care? | 0.5      | 0.05     | 1      |
| What proportion of humans that have been licked on a mucosal membrane (e.g. open wound, mouth) by an animal that had recently consumed the bait will seek care? | 0.7      | 0.07     | 1      |
| What proportion of humans that have been bitten by an animal that has recently consumed the bait will seek care?                                                | 0.8      | 0.08     | 1      |
| What proportion of humans that have received a severe bite (one that penetrates the cranial or abdomen) will seek care?                                         | 0.999    | 0.1      | 1      |
